# Supplementary material
Source: MDPI journal article supplement (https://www.mdpi.com/2227-7390/7/12/1226)
Supplement: s1 [file s1]

# QUESTIONNAIRE CONEXP014FLM

|                        |        |        |
|------------------------|--------|--------|
| <b>No. participant</b> |        |        |
| <b>Group code</b>      | CON014 | EXP014 |
| <b>Date</b>            |        |        |

| Gradation (Likert scale) |     |        |            |
|--------------------------|-----|--------|------------|
| 1                        | 2   | 3      | 4          |
| None                     | Few | Enough | Completely |

| Socioeducational dimension |     |                                                                                                                        |                    |                                     |   |   |
|----------------------------|-----|------------------------------------------------------------------------------------------------------------------------|--------------------|-------------------------------------|---|---|
| Variable                   | No. | Item                                                                                                                   | Choice             | <input checked="" type="checkbox"/> |   |   |
| Gender                     | 1   | Gender                                                                                                                 | Boy                |                                     |   |   |
|                            |     |                                                                                                                        | Girl               |                                     |   |   |
| Age                        | 2   | Age                                                                                                                    | 15 years           |                                     |   |   |
|                            |     |                                                                                                                        | 16 years           |                                     |   |   |
|                            |     |                                                                                                                        | 17 or more years   |                                     |   |   |
| Religion                   | 3   | Religion                                                                                                               | Christian          |                                     |   |   |
|                            |     |                                                                                                                        | Muslim             |                                     |   |   |
|                            |     |                                                                                                                        | Jew                |                                     |   |   |
|                            |     |                                                                                                                        | Hinduist           |                                     |   |   |
|                            |     |                                                                                                                        | Atheist            |                                     |   |   |
|                            |     |                                                                                                                        | Other              |                                     |   |   |
| Flipped use                | 4   | Number of teachers throughout your educational stage who have employed flipped learning                                | 0 – 1 teachers     |                                     |   |   |
|                            |     |                                                                                                                        | 2 – 3 teachers     |                                     |   |   |
|                            |     |                                                                                                                        | 4 or more teachers |                                     |   |   |
|                            | 5   | Number of teachers throughout your educational stage who have used traditional methodology                             | 0 – 1 teachers     |                                     |   |   |
|                            |     |                                                                                                                        | 2 – 3 teachers     |                                     |   |   |
|                            |     |                                                                                                                        | 4 or more teachers |                                     |   |   |
|                            | 6   | Do you know the methodological model of flipped learning?                                                              | Yes                |                                     |   |   |
|                            |     |                                                                                                                        | No                 |                                     |   |   |
|                            |     |                                                                                                                        | Partly             |                                     |   |   |
|                            |     |                                                                                                                        | Gradation          |                                     |   |   |
|                            |     |                                                                                                                        | 1                  | 2                                   | 3 | 4 |
| Preparation                | 7   | Do you consider that your center is equipped with enough technological material to carry out innovative methodologies? |                    |                                     |   |   |
|                            | 8   | What is the degree of preparation of your teachers to use educational technologies in the classroom?                   |                    |                                     |   |   |
|                            | 9   | What is your degree of preparation to use educational technologies in the classroom?                                   |                    |                                     |   |   |
| ICT use frequency          | 10  | How often do you use classroom blogs in the general educational context?                                               |                    |                                     |   |   |
|                            | 11  | How often do you use classroom blogs in the math course?                                                               |                    |                                     |   |   |
|                            | 12  | How often do you use programs to create didactic videos in general?                                                    |                    |                                     |   |   |
|                            | 13  | How often do you use programs to create videos in math?                                                                |                    |                                     |   |   |
|                            | 14  | How often do you use programs to create didactic podcast in general?                                                   |                    |                                     |   |   |
|                            | 15  | How often do you use programs to create podcasts in math?                                                              |                    |                                     |   |   |
|                            | 16  | How often do you use social networks in the general educational field?                                                 |                    |                                     |   |   |
|                            | 17  | How often do you use social networks in the subject of mathematics?                                                    |                    |                                     |   |   |

| Attitudinal dimension |     |                                                                                                            |           |   |   |   |
|-----------------------|-----|------------------------------------------------------------------------------------------------------------|-----------|---|---|---|
| Variable              | No. | Item                                                                                                       | Gradation |   |   |   |
|                       |     |                                                                                                            | 1         | 2 | 3 | 4 |
| Motivation            | 18  | How does the methodology you normally receive in the subject of mathematics contribute to your motivation? |           |   |   |   |
|                       | 19  | How much has the methodology of this experience contributed to your motivation?                            |           |   |   |   |
| Autonomy              | 20  | How does the methodology you normally receive in the mathematics subject                                   |           |   |   |   |

|               |    |                                                                                                                           |  |  |  |  |
|---------------|----|---------------------------------------------------------------------------------------------------------------------------|--|--|--|--|
|               |    | contribute to your autonomy?                                                                                              |  |  |  |  |
|               | 21 | How much has the methodology of this experience contributed to your autonomy?                                             |  |  |  |  |
| Colaboration  | 22 | How does the methodology you normally receive in the subject of mathematics contribute to group collaboration?            |  |  |  |  |
|               | 23 | How much has the methodology of this experience contributed to group collaboration?                                       |  |  |  |  |
| Participation | 24 | How does the methodology you normally receive in the subject of mathematics contribute to your level of participation?    |  |  |  |  |
|               | 25 | How much has the methodology of this experience contributed to your level of participation?                               |  |  |  |  |
| Resolution    | 26 | How does the methodology you normally receive in the subject of mathematics contribute to your ability to solve problems? |  |  |  |  |
|               | 27 | How much has the methodology of this experience contributed to your ability to solve problems?                            |  |  |  |  |
| Class-time    | 28 | How does the methodology you normally receive in the mathematics subject contribute to the use of class time?             |  |  |  |  |
|               | 29 | How much has the methodology of this experience contributed to the use of class time?                                     |  |  |  |  |

| Mathematical dimension |     |                                                                                                                                                           |           |   |   |                                     |
|------------------------|-----|-----------------------------------------------------------------------------------------------------------------------------------------------------------|-----------|---|---|-------------------------------------|
| Variable               | No. | Item                                                                                                                                                      | Gradation |   |   |                                     |
|                        |     |                                                                                                                                                           | 1         | 2 | 3 | 4                                   |
| Concepts               | 30  | How does the methodology you normally receive in the subject of mathematics contribute to the knowledge of scientific language and mathematical concepts? |           |   |   |                                     |
|                        | 31  | How much has the methodology of this experience contributed to your knowledge of scientific language and mathematical concepts?                           |           |   |   |                                     |
| Scientific data        | 32  | How does the methodology you normally receive in the subject of mathematics contribute to the use of data and scientific processes?                       |           |   |   |                                     |
|                        | 33  | How much has the methodology of this experience contributed to your use of data and scientific processes?                                                 |           |   |   |                                     |
| Graphics               | 34  | How does the methodology you normally receive in the subject of mathematics contribute to the ability to analyze and represent graphs?                    |           |   |   |                                     |
|                        | 35  | How much has the methodology of this experience contributed to your ability to analyze and represent graphs?                                              |           |   |   |                                     |
| Results                | 36  | How does the methodology you normally receive in the subject of mathematics contribute to the ability to interpret and reflect results?                   |           |   |   |                                     |
|                        | 37  | How much has the methodology of this experience contributed to your ability to interpret and reflect results?                                             |           |   |   |                                     |
| Decision               | 38  | How does the methodology you normally receive in the mathematics subject contribute to your ability to make mathematical proficiency decisions?           |           |   |   |                                     |
|                        | 39  | How much has the methodology of this experience contributed to your ability to make mathematical proficiency decisions?                                   |           |   |   |                                     |
|                        |     |                                                                                                                                                           |           |   |   | <input checked="" type="checkbox"/> |
| Ratings                | 40  | What is your average grade in general?                                                                                                                    | 0-4.9     |   |   |                                     |
|                        |     |                                                                                                                                                           | 5-5.9     |   |   |                                     |
|                        |     |                                                                                                                                                           | 6-8.9     |   |   |                                     |
|                        |     |                                                                                                                                                           | 9-10      |   |   |                                     |
|                        | 41  | What is your general average in the Mathematics subject?                                                                                                  | 0-4.9     |   |   |                                     |
|                        |     |                                                                                                                                                           | 5-5.9     |   |   |                                     |
|                        |     |                                                                                                                                                           | 6-8.9     |   |   |                                     |
|                        |     |                                                                                                                                                           | 9-10      |   |   |                                     |
|                        | 42  | What has been the grade you have obtained in the Mathematics subject after the development of the experience?                                             | 0-4.9     |   |   |                                     |
|                        |     |                                                                                                                                                           | 5-5.9     |   |   |                                     |
|                        |     |                                                                                                                                                           | 6-8.9     |   |   |                                     |
|                        |     |                                                                                                                                                           | 9-10      |   |   |                                     |
